# Supplementary material for: Spatiotemporal transformation of dissolved organic matter along an alpine stream flow path on the Qinghai–Tibet Plateau: importance of source and permafrost degradation
Source: Copernicus journal article supplement (doi:10.5194/bg-15-6637-2018), 2018-11-08
Supplement: Supplementary file 1 [file bg-15-6637-2018-supplement.zip]

Archive with 3 entries (3 files):
- Table S1.docx
- bg-15-6637-2018-supplement-title-page.pdf
- Fig. S1.jpg
