# Supplementary material for: Spatiotemporal transformation of dissolved organic matter along an alpine stream flow path on the Qinghai–Tibet Plateau: importance of source and permafrost degradation
Source: Copernicus journal article supplement (doi:10.5194/bg-15-6637-2018), 2018-11-08
Supplement: Supplementary file 1 [file bg-15-6637-2018-supplement.zip › bg-15-6637-2018-supplement-title-page.pdf]

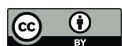

## *Supplement of*

# **Spatiotemporal transformation of dissolved organic matter along an alpine stream flow path on the Qinghai–Tibet Plateau: importance of source and permafrost degradation**

**Yinghui Wang et al.**

*Correspondence to:* Yunping Xu ([ypxu@shou.edu.cn](mailto:ypxu@shou.edu.cn))

- [bg-15-6637-2018-supplement-title-page.pdf](#)
- [Fig. S1.jpg](#)
- [Table S1.docx](#)

The copyright of individual parts of the supplement might differ from the CC BY 4.0 License.
