# Supplementary material for: Spatiotemporal transformation of dissolved organic matter along an alpine stream flow path on the Qinghai–Tibet Plateau: importance of source and permafrost degradation
Source: Copernicus journal article supplement (doi:10.5194/bg-15-6637-2018), 2018-11-08
Supplement: Supplementary file 1 [file bg-15-6637-2018-supplement.zip › Table S1.docx]

**Table S1:** Radiocarbon data for HMW UDOM from AL, PL and site Q-1.

| **Time** | **Fraction of modern standard** | **±** | Δ **14C(‰)** | **±** | **14C age (yr BP)** | **±** |
| --- | --- | --- | --- | --- | --- | --- |
| AL | 0.9358 | 0.0015 | -64.2 | 1.5 | 535 | 15 |
| PL | 0.5971 | 0.0010 | -402.9 | 1.0 | 4145 | 15 |
| Q-1 Aug. 1 | 0.9116 | 0.0015 | -88.4 | 1.5 | 745 | 15 |
| Q-1 Aug. 11 | 0.8816 | 0.0014 | -118.4 | 1.4 | 1015 | 15 |
| Q-1 Sep.5 | 0.8233 | 0.0014 | -176.7 | 1.4 | 1560 | 15 |
