# Supplementary figures and images for: Spatiotemporal transformation of dissolved organic matter along an alpine stream flow path on the Qinghai–Tibet Plateau: importance of source and permafrost degradation
Source: Copernicus journal article supplement (doi:10.5194/bg-15-6637-2018), 2018-11-08

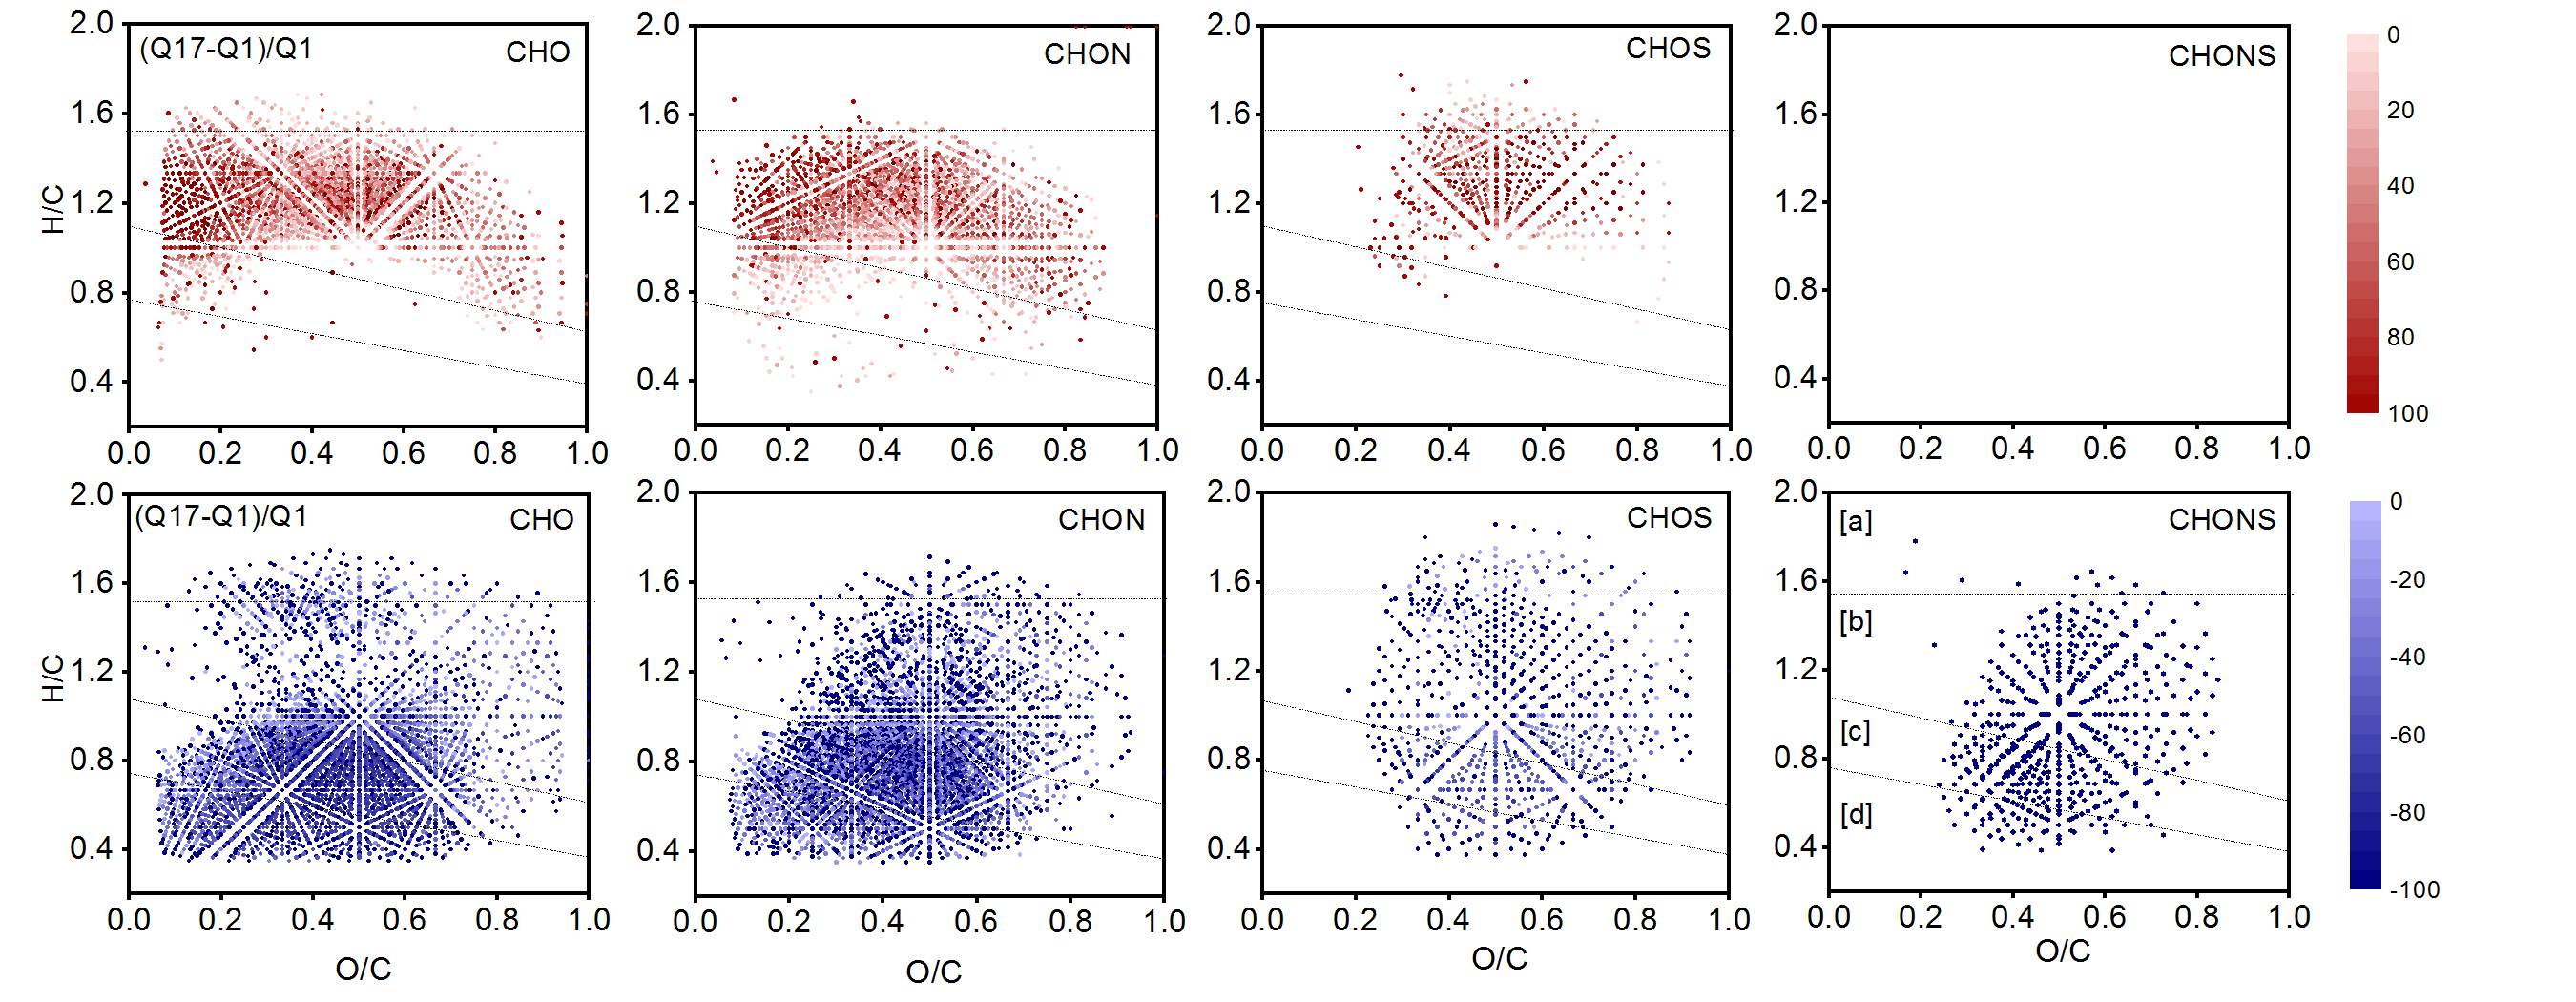

Supplement: Supplementary file 1 [file bg-15-6637-2018-supplement.zip › Fig. S1.jpg]
